# Supplementary material
Source: Elsevier journal article supplement (https://www.sciencedirect.com/science/article/pii/S2341192919301064)
Supplement: mmc2 [file S2341192919301064:mmc2.docx]

**Anexo 2:**

**Definición datos recogidos:** Variables, datos, eventos y complicaciones registradas en el estudio.

**Datos preoperatorios:**

Edad en años

Género

Peso, talla, índice de masa corporal (peso en Kg / (Talla en metros)2)

EuroScore I (http://www.euroscore.org/calcsp.html)

EuroScore II (http://www.euroscore.org/calc.html)

Tipo de cirugía: coronario aislado, coronario aislado y recambio valvular aórtico, coronario aislado y recambio valvular mitral, recambio valvular aórtico, recambio valvular mitral, recambio valvular doble.

Hematocrito (%) y Hemoglobina (g/dl)

SrO2 basal: determinación realizada en quirófano, con el paciente en decúbito supino, sin administración de oxígeno ni sedoanalgesia.

pH, pO2 (mmHg), pCO2(mmHg), HCO3 (mmol/L), exceso de base, lactato (mmol/L)

BIS

Presión arterial media (PAM en mmHg),

Temperatura nasofaríngea (ºC)

**Datos intraoperatorios:**

Se recogieron los siguientes datos pre y post transfusión:

Gasometría arterial: pH, pO2 (mmHg), pCO2(mmHg), HCO3 (mmol/L), exceso de base, lactato (mmol/L), Hematocrito (%) y Hemoglobina (mg/dl)

SrO2 basal y SrO2 más baja durante la cirugía.

BIS

PAM en mmHg,

Número de unidades de CH trasfundidas

Valor de la SrO2 registrado en el momento en que la hemoglobina fue más baja.

**Datos postoperatorios:**

Tiempo hasta la extubación en horas

Necesidad de soporte inotrópico y vasopresor

Estancia hospitalaria y en UCI en días

Complicaciones neurológicas: convulsiones, delirium, accidente vascular cerebral transitorio o permanente, coma.

Complicaciones respiratorias: insuficiencia respiratoria, reintubación, ventilación mecánica > 72h

Complicaciones renales: aumento de la creatinina dos veces el nivel basal, necesidad de terapia de sustitución renal

Complicaciones hemodinámicas: arritmias precisando tratamiento, shock cardiogénico (necesidad de dos o más fármacos inotrópicos y/ o vasoconstrictores +/- balón de contrapulsación intraaórtico), taponamiento.

Mortalidad hasta el alta hospitalaria y a los 30 días.
